# Supplementary material
Source: PubMed Central journal article supplement (PMC2669525)
Supplement: cei0155-0487-SD1.pdf [file cei0155-0487-SD1.pdf]

Supplementary data: Table 1  
 Brosbøl-Ravnborg *et al.*  
 TLR-induced GM-CSF secretion...

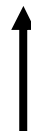

| Variable                             | Statistic      | Healthy (n=12) | CD WT (n=19)   | CD 1mut (n=16) | CD 2mut (n=6) |
|--------------------------------------|----------------|----------------|----------------|----------------|---------------|
| <b>Gender</b>                        |                |                |                |                |               |
| Males                                | n (%)          | 2 (17)         | 9 (47)         | 6 (38)         | 0 (0)         |
| Females                              | n (%)          | 10 (83)        | 10 (53)        | 10 (63)        | 6 (100)       |
| <b>Familial disposition</b>          | n (%)          | 0 (0)          | 3 (16)         | 5 (31)         | 2 (33)        |
| <b>Current smoker</b>                | n (%)          | 1 (8)          | 5 (26)         | 3 (19)         | 2 (33)        |
| <b>Age at inclusion</b>              | mean (range)   | 30.3 (24-44)   | 43.6 (22-78)   | 36.0 (18-66)   | 42.5 (25-73)  |
| <b>Age at diagnosis</b>              | mean (range)   |                | 31.0 (12-57)   | 27.3 (17-56)   | 27.5 (17-52)  |
| <b>Age at diagnosis &lt;40 yrs</b>   | n (%)          |                | 13 (68)        | 14 (88)        | 5 (83)        |
| <b>Location</b>                      |                |                |                |                |               |
| Ileum (L1)                           | n (%)          |                | 4 (21)         | 4 (25)         | 0 (0)         |
| Colon (L2)                           | n (%)          |                | 8 (42)         | 3 (19)         | 1 (17)        |
| Ileum and colon (L3)                 | n (%)          |                | 7 (37)         | 9 (56)         | 5 (83)        |
| <b>Behaviour</b>                     |                |                |                |                |               |
| Inflammatory (B1)                    | n (%)          |                | 10 (53)        | 6 (38)         | 1 (17)        |
| Stricturating (B2)                   | n (%)          |                | 5 (26)         | 4 (25)         | 4 (67)        |
| Penetrating (B3)                     | n (%)          |                | 4 (21)         | 6 (38)         | 1 (17)        |
| <b>Harvey-Bradshaw Index</b>         | median (range) |                | 4 (2-23)       | 3 (1-15)       | 4 (1-7)       |
| <b>Active disease (HBI≥4)</b>        | n (%)          |                | 13 (68)        | 6 (38)         | 3 (50)        |
| <b>Medical treatment</b>             |                |                |                |                |               |
| Steroids                             | n (%)          |                | 4 (21)         | 1 (6)          | 0 (0)         |
| Azathioprine/6-MP                    | n (%)          |                | 7 (37)         | 6 (38)         | 0 (0)         |
| 5-ASA                                | n (%)          |                | 5 (26)         | 6 (38)         | 4 (67)        |
| Antibiotics                          | n (%)          |                | 3 (16)         | 1 (6)          | 1 (17)        |
| <b>Previous biologicals</b>          | n (%)          |                | 5 (26)         | 6 (38)         | 3 (50)        |
| <b>Previous surgery</b>              | n (%)          |                | 9 (47)         | 10 (63)        | 4 (67)        |
| <b>Laboratory tests absolute</b>     |                |                |                |                |               |
| Haemoglobin (mmol/l)                 | mean (range)   |                | 8.3 (6.1-9.9)  | 8.1 (6.2-8.9)  | 8.3 (7.5-9.3) |
| Leukocyte count (10 <sup>9</sup> /l) | mean (range)   |                | 8.0 (3.7-17.8) | 6.4 (4.0-10.7) | 7.3 (5.8-9.6) |
| C-reactive protein (nmol/l)          | mean (range)   |                | 103 (7-509)    | 105 (7-591)    | 62 (20-129)   |
| Albumin (μmol/l)                     | mean (range)   |                | 598 (495-682)  | 592 (471-664)  | 604 (557-659) |
| <b>Laboratory tests abnormal</b>     |                |                |                |                |               |
| Haemoglobin                          | n (%)          |                | 4 (21)         | 3 (19)         | 0 (0)         |
| Leukocyte count                      | n (%)          |                | 3 (16)         | 0 (0)          | 0 (0)         |
| C-reactive protein                   | n (%)          |                | 6 (32)         | 5 (31)         | 1 (17)        |
| Albumin                              | n (%)          |                | 7 (37)         | 6 (38)         | 2 (33)        |
